# Supplementary material for: Herpes simplex virus lymphadenitis is associated with tumor reduction in a patient with chronic lymphocytic leukemia
Source: JCI journal article supplement (doi:10.1172/jci161109), 2022-07-21
Supplement: sd1 [file 1]

## Supplementary Appendix

**Table S1. Antibodies used in this study.**

| <b>Antibody</b> | <b>Clone</b> | <b>Company</b> |
|-----------------|--------------|----------------|
| BCL-2           | 100          | Biolegend      |
| CCR7            | 150503       | BD             |
| CD127           | A019D5       | Biolegend      |
| CD19            | H1B19        | Biolegend      |
| CD19            | SJ25C1       | BD             |
| CD20            | 2H7          | Biolegend      |
| CD28            | CD28.2       | Biolegend      |
| CD3             | UCHT1        | Biolegend      |
| CD3             | HIT3a        | Biolegend      |
| CD38            | HIT2         | Biolegend      |
| CD4             | RPA-T4       | Biolegend      |
| CD45RA          | HI100        | Biolegend      |
| CD5             | UCHT2        | Biolegend      |
| CD71            | CY1G4        | Biolegend      |
| CD8             | RPA-T8       | Biolegend      |
| CTLA-4          | BNI3         | Biolegend      |
| Gzmb            | GB11         | BD             |
| HLA-DR          | L243         | Biolegend      |
| IgD             | IA6-2        | Biolegend      |
| Ki-67           | B56          | BD             |
| PD-1            | EH12-2H7     | Biolegend      |
| Perforin        | dG9          | Biolegend      |

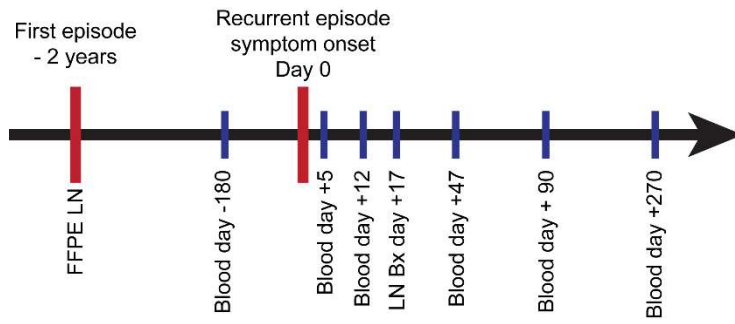

**Figure S1.** Timeline of samples collected and analyzed in this study.

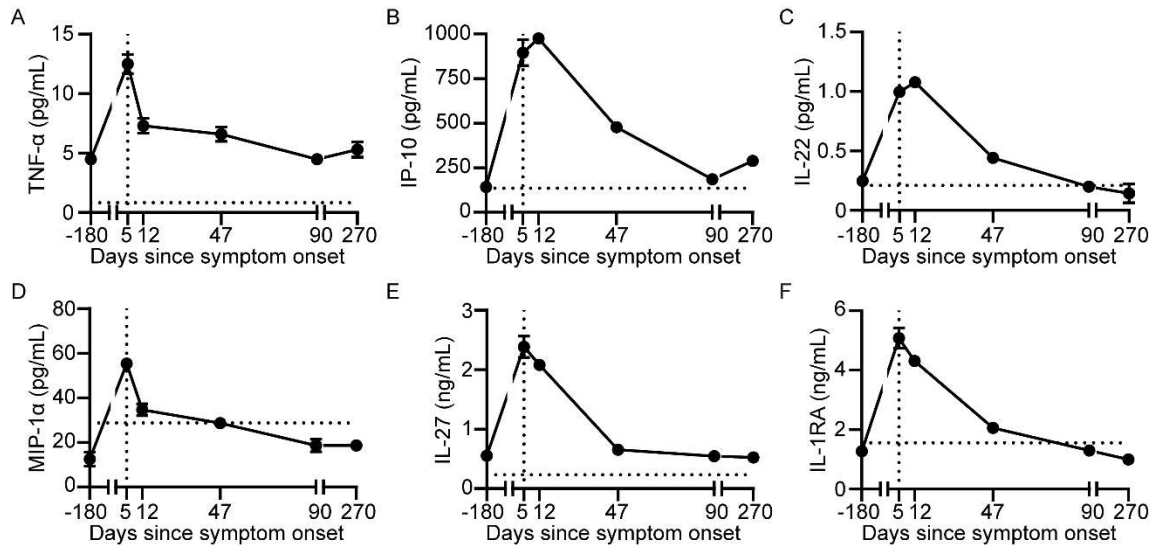

**Figure S2.** Mean plasma levels of additional cytokines of interest over time. Levels of TNF- $\alpha$  (A), IP-10 (B), IL-22 (C), MIP-1 $\alpha$  (D), IL-27 (E), and IL-1RA (F) over time are depicted. Horizontal dotted line = levels in pooled plasma from aged-matched healthy individuals. Vertical dotted line = day of presentation. All measurements performed in quadruplicate. Error bars = standard deviation.

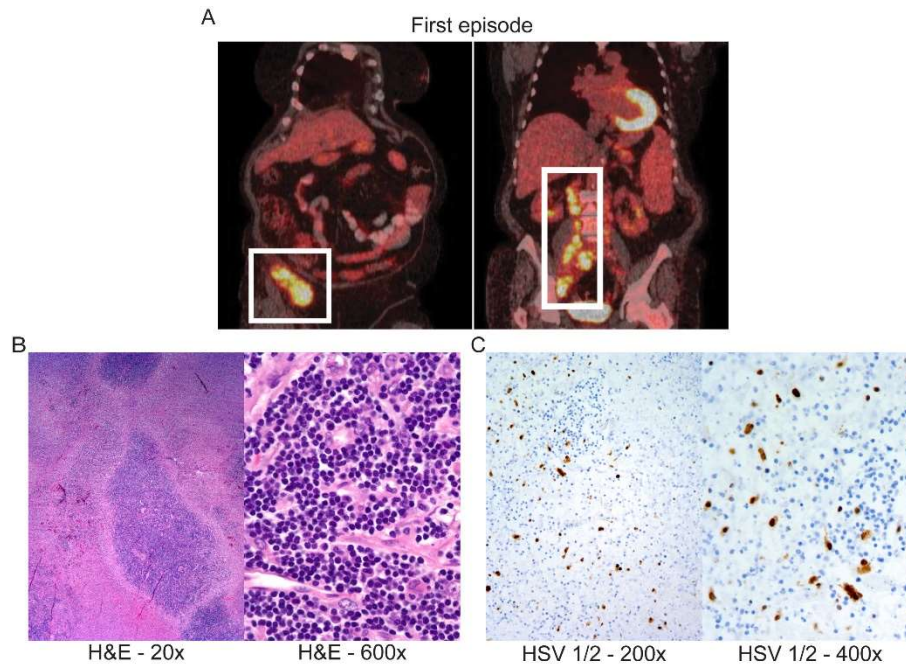

**Figure S3.** Clinical diagnosis of initial episode of HSVL. **(A)** PET/CT scan obtained on first episode with right-sided FDG-avid adenopathy. Micrographs of H&E **(B)** and HSV 1/2 **(C)** stains of excisional biopsy of the FDG-avid right obturator node on first presentation.
